# Supplementary material for: MiR-34a and miR-34b/c have distinct effects on the suppression of lung adenocarcinomas
Source: PubMed Central journal article supplement (PMC6353903; doi:10.1038/s12276-018-0203-1), 2019-01-17

Supplementary Table 1. qRT-PCR primers used in this study.

| Gene         | Forward                       | Reverse                       |
|--------------|-------------------------------|-------------------------------|
| <i>Rpl32</i> | 5'-GGAGAAGGTTCAAGGGCCAG-3'    | 5'-TGCTCCCATAACCGATGTTGG-3'   |
| <i>Fn1</i>   | 5'-CCCTATCTCTGATACCGTTGTCC-3' | 5'-TGCCGCAACTACTGTGATTCGG-3'  |
| <i>Cdh2</i>  | 5'-CCTCCAGAGTTTACTGCCATGAC-3' | 5'-CCACCACTGATTCTGTATGCCG-3'  |
| <i>Cldn3</i> | 5'-CACCTGACTACCGGGCCTAG-3'    | 5'-GGTTTCTTTGTCCATTTCGGCT-3'  |
| <i>Dsp</i>   | 5'-GGTACGTGACGGGCCAGGA-3'     | 5'-GGCCCACGGAAGGGACAAGC-3'    |
| <i>Hkl1</i>  | 5'-GAAAGGAGACCAACAGCAGAGC-3'  | 5'-TTCGTTCCCTCCGAGATCCAAGG-3' |
| <i>Mmab</i>  | 5'-GTGGTGCCTCTTGTCCAGATGG-3'  | 5'-TCTCTTGGCTGCCCTCCTTCAT-3'  |

## Supplementary Figure Legends

Supplementary Figure 1. miR-34a and miR-34b/c show no correlated expression patterns in lung adenocarcinomas.

- A. Scatter plots between miR-34 family members using human lung adenocarcinoma TCGA data (n=489). Spearman correlation r and p values are denoted.
- B. Scatter plots between miR-34 family members using qRT-PCR data from 39 human non-small cell lung cancer cell lines. Spearman correlation r and p values are denoted.
- C. Scatter plots between miR-34 family members using qRT-PCR data from 13 murine lung adenocarcinoma cell lines. Spearman correlation r and p values are denoted.

Supplementary Figure 2. miR-34a and miR-34b/c are predicted to form different duplex structures with target genes.

- A. qRT-PCR of miR-34b/c-specific target genes (*Hkl* and *Mmab*) in miR-34-transduced 344SQ cells. Expression levels were normalized to the *Rpl32* level, and then relative values to those of 344SQ-vector (set at 1.0) were presented. Data are expressed as mean+SD (n=3). \*\*P≤0.01 compared with vector and #P≤0.05, ##P≤0.01 compared with miR-34a cells; two-tailed Student's t test.
- B. Predicted 2D structures of miRNA/mRNA duplex using VfoldCPX software (<http://rna.physics.missouri.edu/vfoldCPX>). 3'-UTR's of miR-34b/c-specific genes, *Hkl* and *Mmab* (orange), and miR-34 family members (blue) are demonstrated in the hybrid duplex models.

Supplementary Figure 3. Generation of miR-34-triple knockout and *Kras*-mutant mice.

- A. Diagram shows that *Kras*-LSL (LoxP-Stop-LoxP) mice harboring the *Kras* mutation (*Kras*<sup>G12D</sup>) were bred with miR-34-triple knockout (TKO) mice (in whom all three miR-34 members were deleted by Cre-LoxP system after intratracheal injection of Cre lentivirus).
- B. Genotyping of *Kras*-LSL, miR-34a-flox, and miR-34bc-flox mice. Wildtype (wt), heterozygote- (wt/fl), and homozygote-floxed (fl/fl) mice were identified by using specific PCR primer sets.

human lung adenocarcinoma TCGA data (n=489)

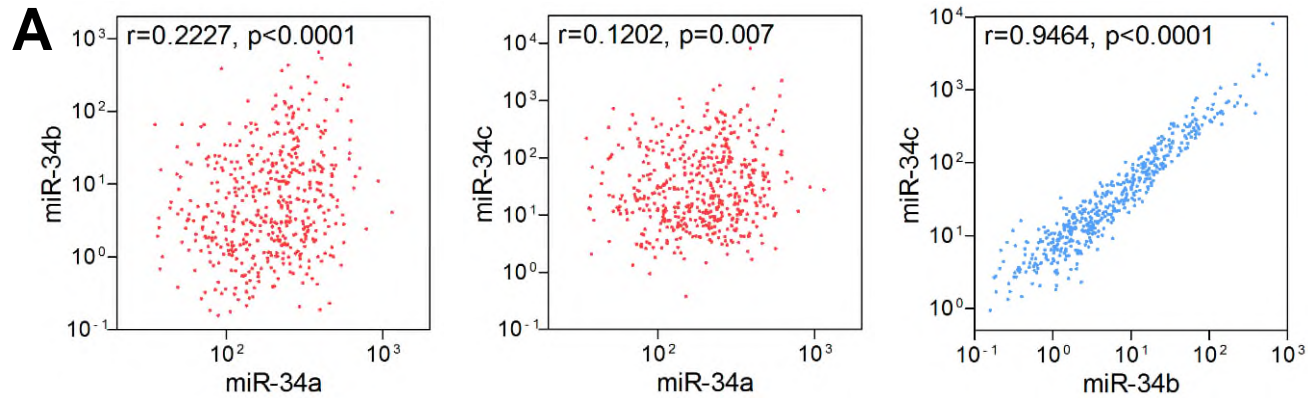

human non-small cell lung cancer cell lines (n=39)

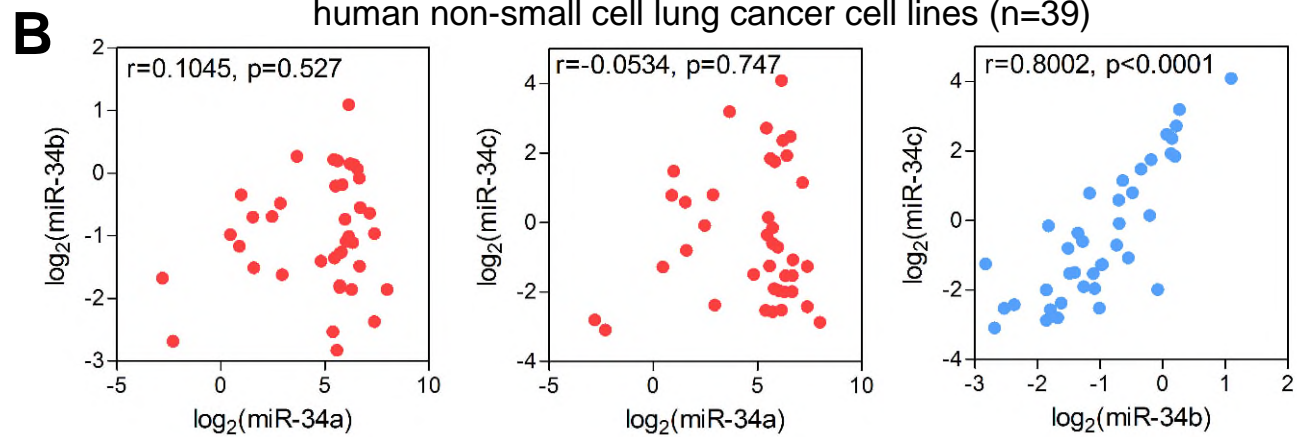

murine lung adenocarcinoma cell lines (n=13)

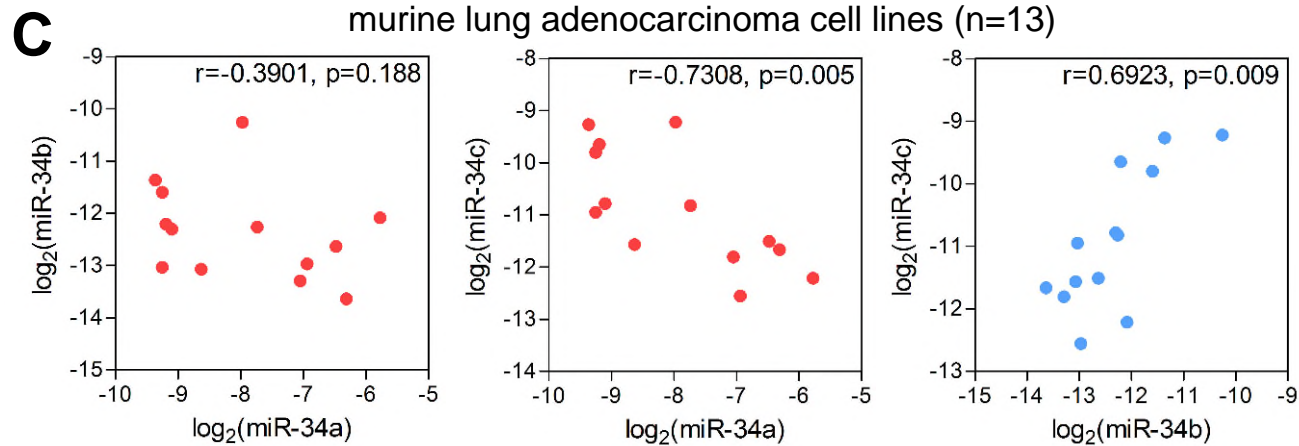

**A**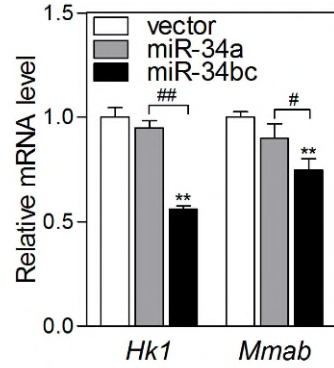**B**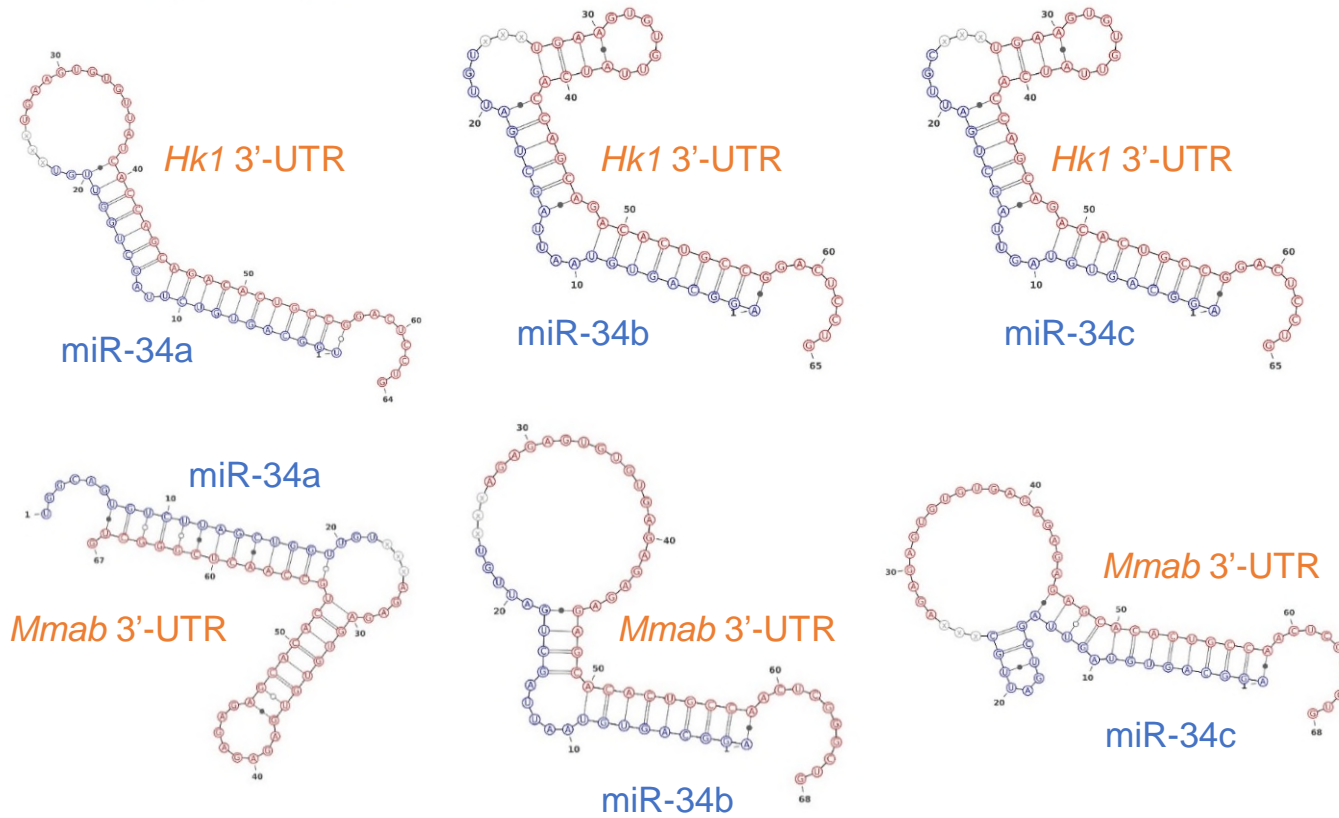

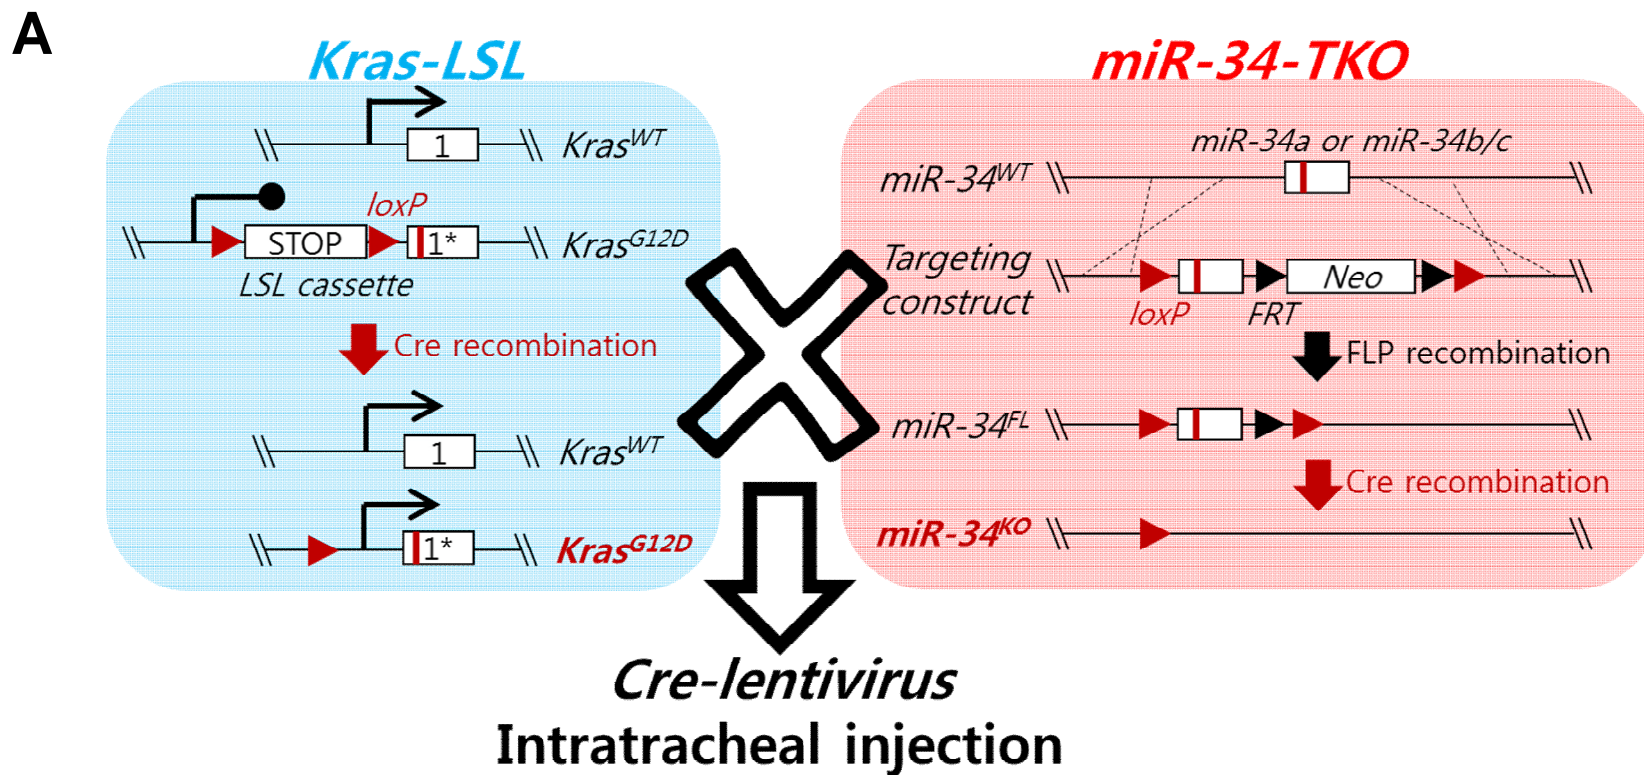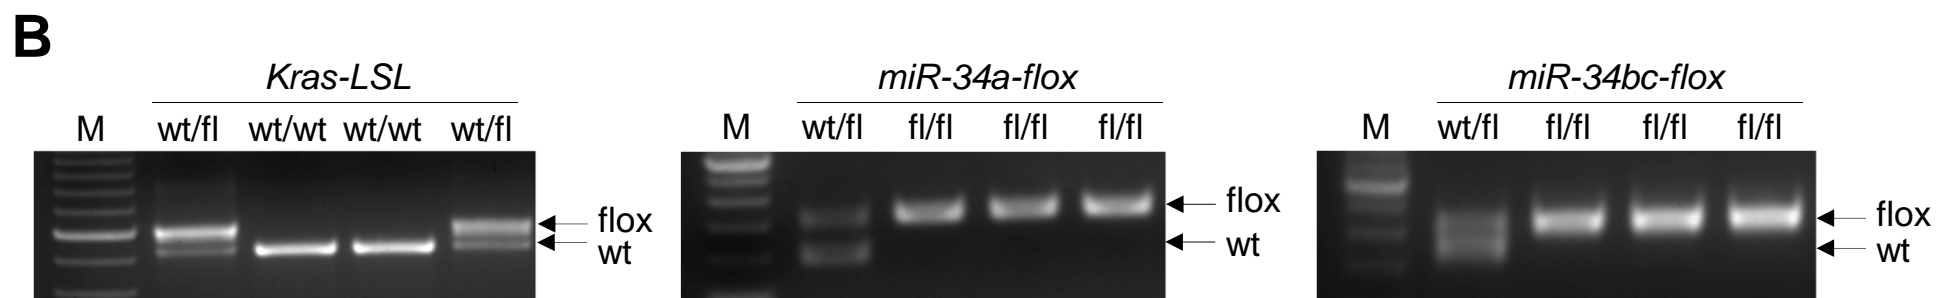

Supplement: 12276_2018_203_MOESM1_ESM.pdf [file 12276_2018_203_MOESM1_ESM.pdf]
